# Supplementary material for: ATR Safeguards Epithelial-to-Mesenchymal Transition by Countering R-loops and Enabling Transcription Reprogramming
Source: JCI journal article supplement (doi:10.1172/jci192225), 2026-01-22

Fully unedited blot/gel for Figure 1B

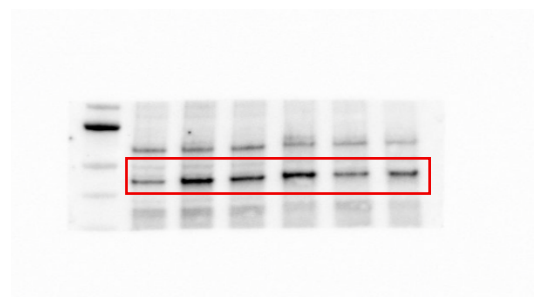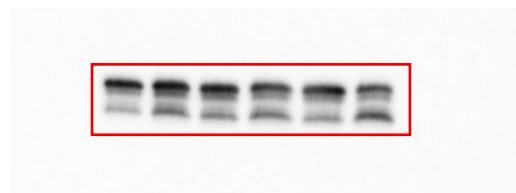

Fully unedited blot/gel for Figure 2A

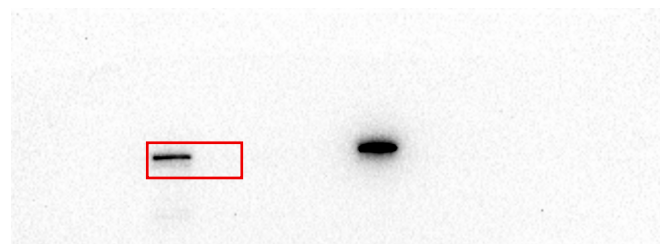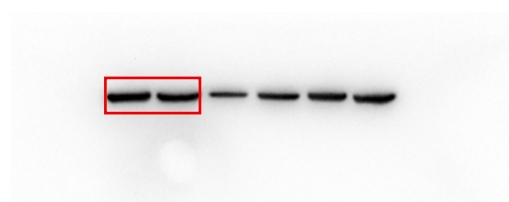

Fully unedited blot/gel for Figure 3I

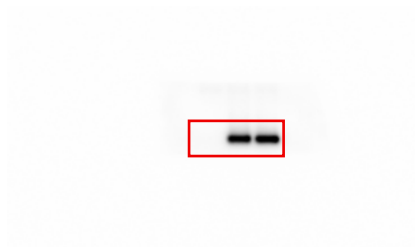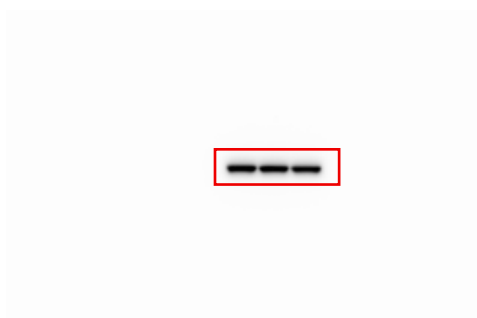

Fully unedited blot/gel for Figure 4A

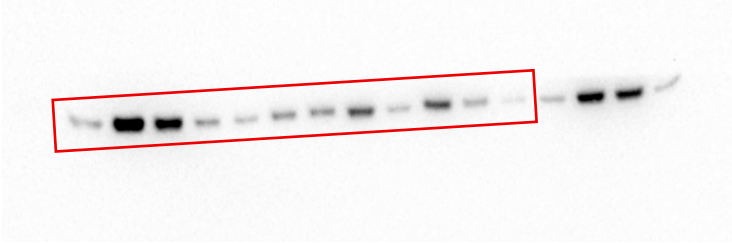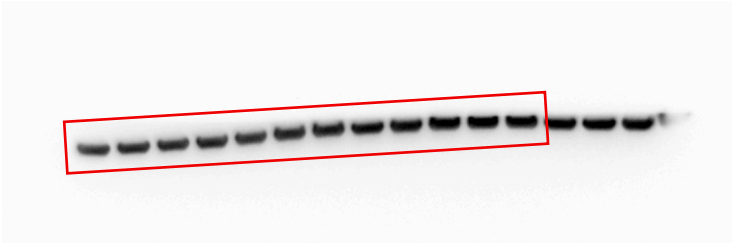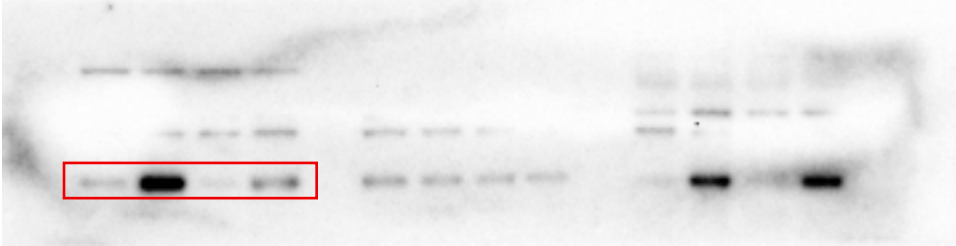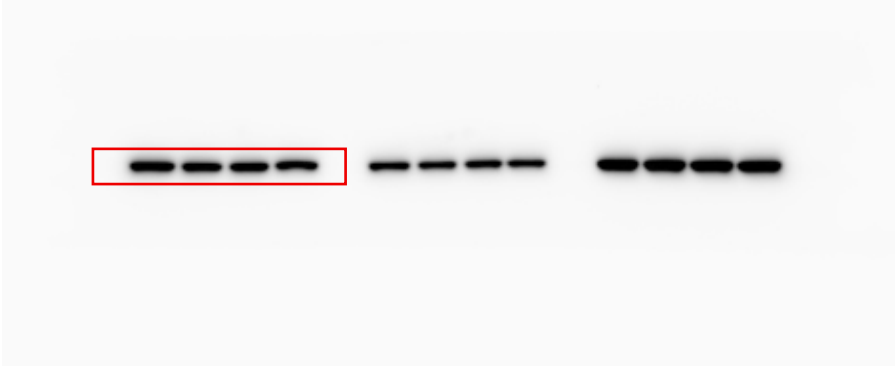

Fully unedited blot/gel for Figure 4J

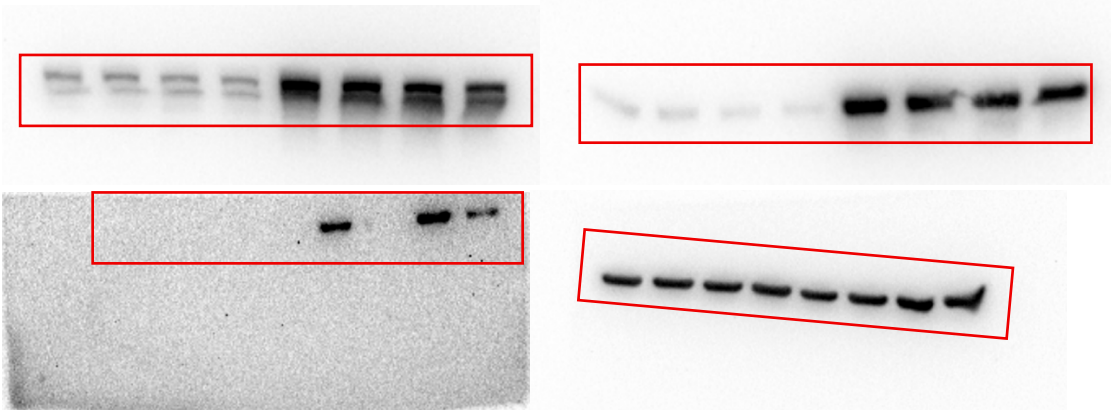

Fully unedited blot/gel for Supplemental Figure 1A

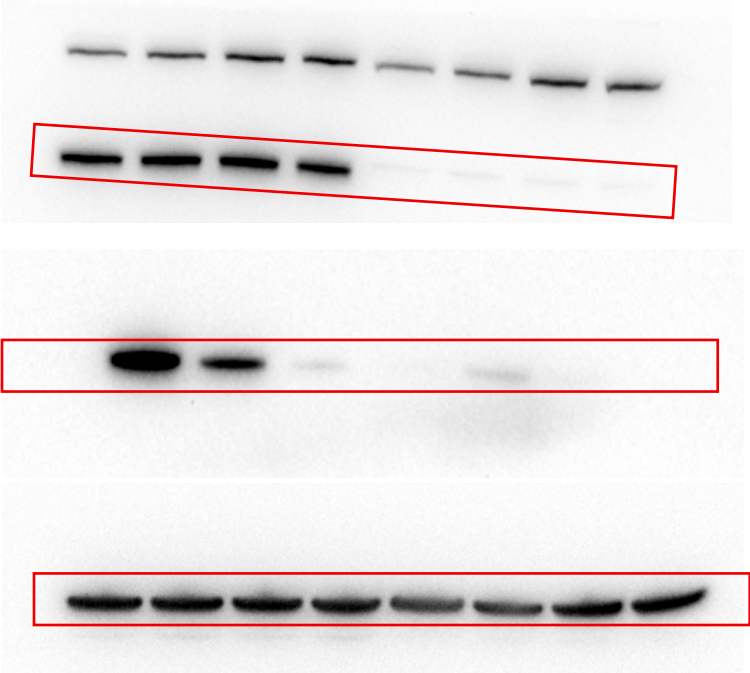

Fully unedited blot/gel for Supplemental Figure 5D

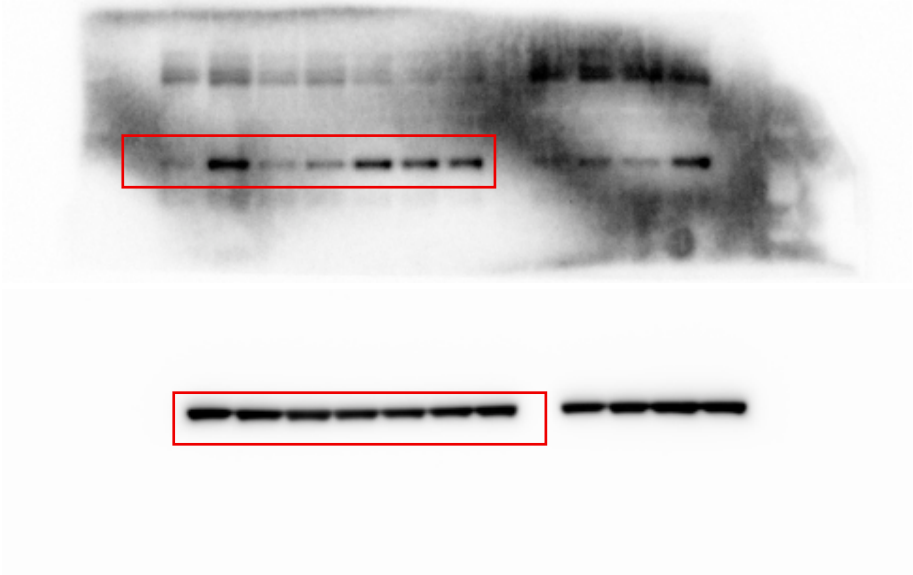

Supplement: sd1 [file 1]
